# Supplementary material for: Expression of PD-L1 in Hormone-naïve and Treated Prostate Cancer Patients Receiving Neoadjuvant Abiraterone Acetate plus Prednisone and Leuprolide
Source: Oxford University Press journal article supplement (doi:10.1158/1078-0432.ccr-17-0807), 2017-09-11
Supplement: 10780432ccr170807-sup-180749_3_supp_4215147_wwqf4k.xlsx [file 10780432ccr170807-sup-180749_3_supp_4215147_wwqf4k.xlsx]

## Sheet: Sheet1
Supplementary Table 1. Distribution patterns of PD-L1(+) tumor cells in hormone-naïve PCa
	A. Scattered pattern
	ID	PD-L1 (E1L3N)	ERG		PTEN loss
	UN8	1-4%	pos		loss
	UN75	1-4%	neg		no
	UN97	1-4%	neg		loss
	UN116	1-4%	pos		no
	UN20	5-24%	pos		loss
	UN52	5-24%	neg		no
	UN88	5-24%	neg		loss
	UN121	5-24%	neg		no
	UN71	25-49%	neg		no
	UN107	25-49%	neg		no
B. Nodular pattern
ID	PD-L1 (E1L3N)	ERG			PTEN loss
		PD-L1 (+) region	PD-L1 (-) region		PD-L1 (+) region	PD-L1 (-) region
UN69	1-4%	neg	neg		no	no
UN94	1-4%	neg	neg		loss	no
UN44	5-24%	pos	pos		no	loss
UN98	5-24%	neg	neg		patchy loss	patchy loss
UN60	25-49%	neg	neg		no	no
UN114	25-49%	neg	neg		no	patchy loss
UN125	≥50%	neg	neg		patchy loss	no
	C. Interface pattern
	ID	PD-L1 (E1L3N)	ERG		PTEN loss
	UN127	5-24%	neg		loss
