# Supplementary material for: Expression of PD-L1 in Hormone-naïve and Treated Prostate Cancer Patients Receiving Neoadjuvant Abiraterone Acetate plus Prednisone and Leuprolide
Source: Oxford University Press journal article supplement (doi:10.1158/1078-0432.ccr-17-0807), 2017-09-11
Supplement: 10780432ccr170807-sup-180749_3_supp_4215151_nnqf4l.xlsx [file 10780432ccr170807-sup-180749_3_supp_4215151_nnqf4l.xlsx]

## Sheet: Sheet1
Supplementary Table 2. Clinicopathologic characteristics of hormone-naïve PCa expressing PD-L1 in ≥25% of tumor cells
ID	PSA (ng/ml)	Race	Age	Weight (gm)	Grade Group (GS)	pT Stage	pN stage	Margin	AR score	ERG	PTEN Loss	PD-L1 (E1L3N)
UN60	23.7	white	64	43	5 (4+5=9)	3b	0	pos	3	neg	neg	25-49%
UN71	10.4	white	63	34	4 (4+4=8)	3a	0	neg	2	neg	neg	25-49%
UN107	NA	white	60	58	2 (3+4=7)	2c	0	neg	6	neg	neg	25-49%
UN114	7.8	white	55	50	3 (4+3=7)	3b	0	neg	6	neg	neg	25-49%
UN125	6.8	black	61	37	5 (4+5=9)	3a	0	neg	1	neg	pos	≥50%
